# Supplementary material for: High monocytic MDSC signature predicts multi-drug resistance and cancer relapse in non-Hodgkin lymphoma patients treated with R-CHOP
Source: Front Immunol. 2024 Jan 18;14:1303959. doi: 10.3389/fimmu.2023.1303959 (PMC10831358; doi:10.3389/fimmu.2023.1303959)
Supplement: Supplementary file 2 [file Table_1.xlsx]

## Sheet: Sheet1
Supplementary Table 1. Antibodies and kits details
Antibody details:
Sl. No.	Antibody/Kit	Make	Catalogue No
1	PE-Cy™5 Mouse Anti-Human CD4 Antibody	BD Pharmingen™	555348
2	FITC Mouse Anti-Human CD8 Antibody	BD Pharmingen™	555634
3	PE Mouse Anti-Human CD25 Antibody	IMGENEX	IMG-5918D
4	FOXP3 Monoclonal Antibody (PCH101)	eBioscience™	11-4776-71
5	PE-Cy™5 Mouse Anti-Human CD45RO Antibody	BD Pharmingen™	555494
6	Purified mouse anti-human CD45RA Antibody	BD Pharmingen™	31264X
7	FITC anti-human/mouse Granzyme B Antibody	BioLegend	515403
8	FITC mouse anti-human CD 80 Antibody	BD Pharmingen™	555683
9	Purified anti-human CD68 Antibody	BioLegend	333801
10	Purified anti-human CD163 Antibody	BioLegend	333602
11	Alexa Fluor® 488 anti-human CD206 (MMR) Antibody	BioLegend	321113
12	Purified anti-human CD33 Antibody	BioLegend	303302
13	PE anti-mouse/human CD11b Antibody	BioLegend	101208
14	Purified anti-human CD14 antibody	BioLegend	301801
15	CD15/SSEA1 (MC480) Mouse monoclonal Antibody	Cell Signalling Technology	4744S
16	P-Glycoprotein Monoclonal Antibody (C219)	Invitrogen	MA1-26528
17	Purified anti-human/mouse MRP1 (ABCC1) Antibody	BioLegend	370202
18	Purified anti mouse Ly6G/Ly6C -FITC Antibody	BioLegend	108406
19	Ly-6G Monoclonal Antibody (1A8-Ly6g)	eBioscience™	16-9668-82
20	FITC anti-mouse Ly-6C Antibody	BioLegend	128005
21	Biotin Anti-CD33 antibody [HIM3-4]	Abcam	ab21892
22	Purified IL-2 anti-human Antibody	Santa Cruz	sc-7896
23	Purified IL-4 anti-human Antibody	Peprotech	500-P24
24	Purified human IL-1β/ IL-1F2 Antibody	R & D systems	AF-201-NA
25	Purified anti mouse/human IL-6 Antibody	Novus	NB600-1131
26	Purified NA/LE Rat Anti-Human IL-10 Antibody	BD Biosciences	554703
28	Purified IL-12 (p70) Antibody	BioLegend	511801
29	Purified IL-13 anti-human Antibody	BioLegend	501901
30	Purified rabbit VEGF polyclonal antibody(147)	Santa Cruz Biotechnology	sc-507
31	Purified Rat Anti-Mouse, Human, Pig TGF-β1 Antibody	BD Pharmingen™	555052
32	Purified TNFα Antibody	Santa Cruz	sc-1351
33	Purified anti-human IFN gamma Antibody	Invitrogen	4-7317-85
34	PurifiedIL-6 Monoclonal Antibody	Invitrogen	AHC0662
35	Purified NA/LE Rat Anti-Human IL-10 Antibody	BD Pharmingen™	554703
36	Human IL-1 beta /IL-1F2 Antibody	R & D systems	AF-201-NA
37	Ultra-LEAF™ Purified anti-mouse VEGF-A Antibody	BioLegend	512809
38	Recombinant Human IL-6	R & D systems	206-IL-025/CF
39	Recombinant Mouse IL-6	BD Pharmingen™	554582
40	Recombinant Human IL-10	BD Pharmingen™	554611
41	Recombinant Mouse GM-CSF	Miltenyi Biotech	130-095-739
42	Recombinant Human IL-1 beta/IL-1F2 Protein	R & D systems	20L-LB-005
43	Purified anti-STAT3 Phospho (Tyr705) Antibody	BioLegend	651002
44	Purified p-Stat3 (Ser 727) Antibody	Santa Cruz Biotechnology	sc-21876
45	Purified anti-STAT3 Antibody	BioLegend	678002
46	Purifued p-Stat1 (Tyr 701) Antibody	Santa Cruz Biotechnology	sc-135648
47	Purified NFκB p50 Antibody (C-19)	Santa Cruz Biotechnology	sc-1190
48	Anti-NF-kB p65 Antibody	Abcam	ab7970
49	Human Phospho-IkB-alpha (S32/S36) Antibody	R & D systems	AF4809
50	β- Actin Antibody (C4)	Santa Cruz Biotechnology	sc-47778
51	Histone H1 Antibody (AE-4)	Santa Cruz Biotechnology	sc-8030
52	Streptavidin Particles Plus - DM	BD Biosciences	557812
53	Rhodamine 123	Sigma-Aldrich	R8004
54	Goat Anti-Rat IgG H&L (FITC) Antibody	Abcam	ab6840
55	Goat Anti-Mouse IgG1 heavy chain (APC/Cy7®) Antibody	Abcam	ab130785
56	goat anti-rabbit IgG-PerCP-Cy5.5 Antibody	Santa Cruz Biotechnology	sc-45101
57	Goat Anti-Mouse IgG (Fc specific)–FITC Antibody	Sigma-Aldrich	F5897
58	WesternBright™ ECL HRP substrate kit	Advansta	K-12045-D20
59	Silencer™ siRNA Construction Kit	Invitrogen™	AM1620
60	Chromatin Immunoprecipitation (ChIP) Assay Kit	Sigma-Aldrich	17-295
61	RevertAid First Strand cDNA Synthesis Kit	Thermo Fisher Scientific	K-1622
